# Supplementary material for: Design of potent tyrosinase inhibiting N-arylated-4-yl-benzamides bearing 2-aminothiazole-triazole bi-heterocycles: mechanistic insight through enzyme inhibition, kinetics and computational studies
Source: PubMed Central journal article supplement (PMC11106707; doi:10.1039/d4ra01063a), 2024-05-21
Supplement: RA-014-D4RA01063A-s001.pdf [file RA-014-D4RA01063A-s001.pdf]

**Designing of potent Tyrosinase Inhibiting *N*-Arylated-4-yl-benzamides bearing 2-aminothiazole-triazole bi-heterocycles: Mechanistic Insight through Enzyme Inhibition, Kinetics and Computational Studies.**

Farhan Mahmood Khan<sup>1</sup>, Muhammad Athar Abbasi<sup>1,\*</sup>, Aziz-ur-Rehman<sup>1</sup>, Sabahat Zahra Siddiqui<sup>1</sup>, Abdul Rehman Sadiq Butt<sup>1</sup>, Hussain Raza<sup>2</sup>, Mubashir Hassan<sup>2</sup>, Syed Adnan Ali Shah<sup>3</sup>, Muhammad Shahid<sup>4</sup> and Song Ja Kim<sup>2</sup>

<sup>1</sup>Department of Chemistry, Government College University, Lahore-54000, Pakistan.

<sup>2</sup>College of Natural Sciences, Department of Biological Science, Kongju National University, Gongju, 32588, South Korea.

<sup>3</sup>Faculty of Pharmacy and Atta-ur-Rahman Institute for Natural Products Discovery (AuRIns), Level 9, FF3, Universiti Teknologi MARA, Puncak Alam Campus, 42300 Bandar Puncak Alam, Selangor DarulEhsan, Malaysia.

<sup>4</sup>Department of Biochemistry, University of Agriculture, Faisalabad-38040, Pakistan.

---

\*Corresponding Authors: Dr. Muhammad Athar Abbasi, E-mail: [abbasi@gcu.edu.pk](mailto:abbasi@gcu.edu.pk) Tel: (+92)-42-111000010 Ext. 266

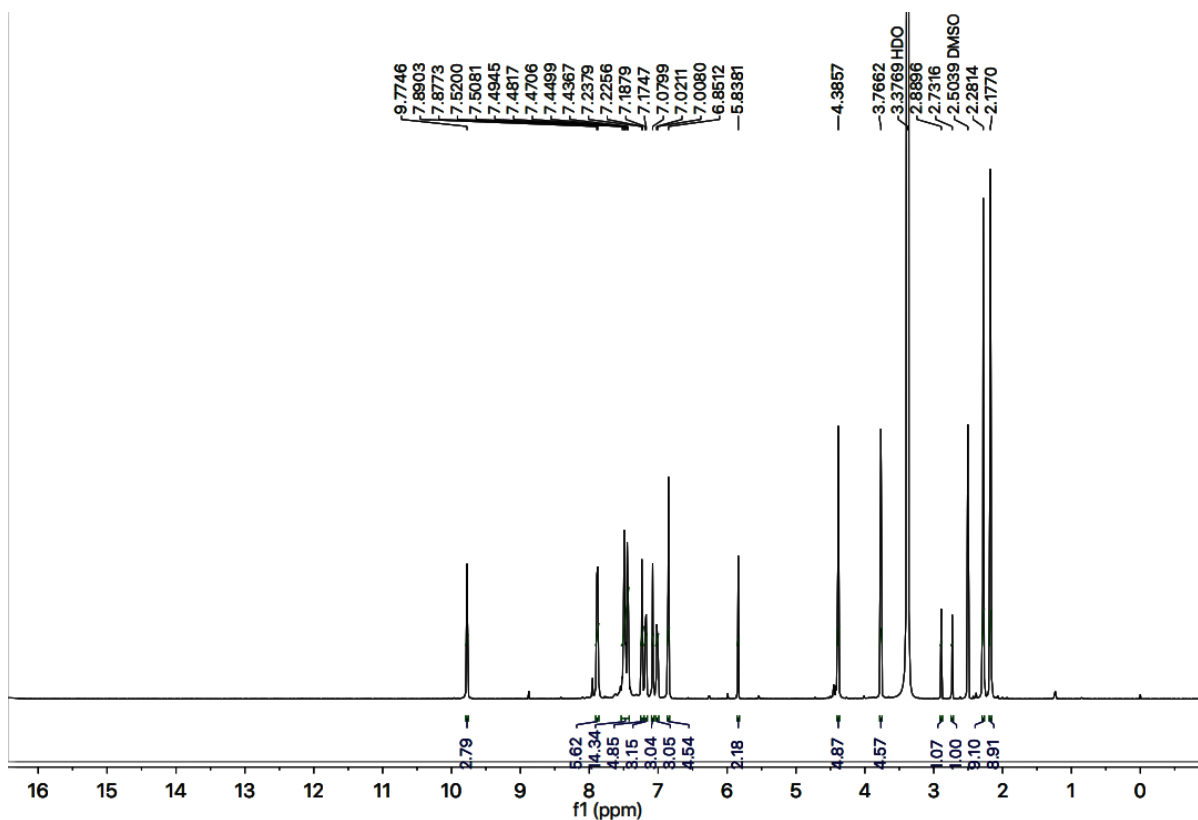

FIGURE S1 <sup>1</sup>H-NMR spectrum of 9a

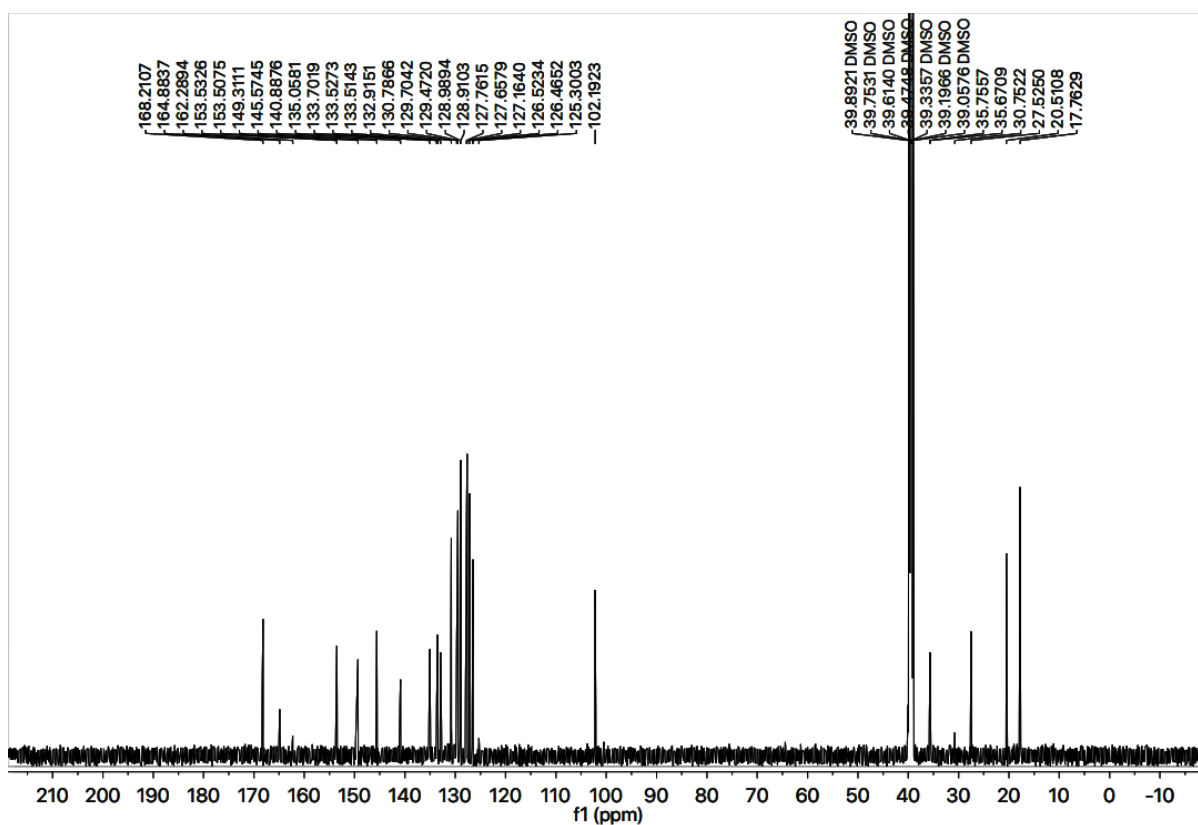

FIGURE S2 <sup>13</sup>C-NMR spectrum of 9a

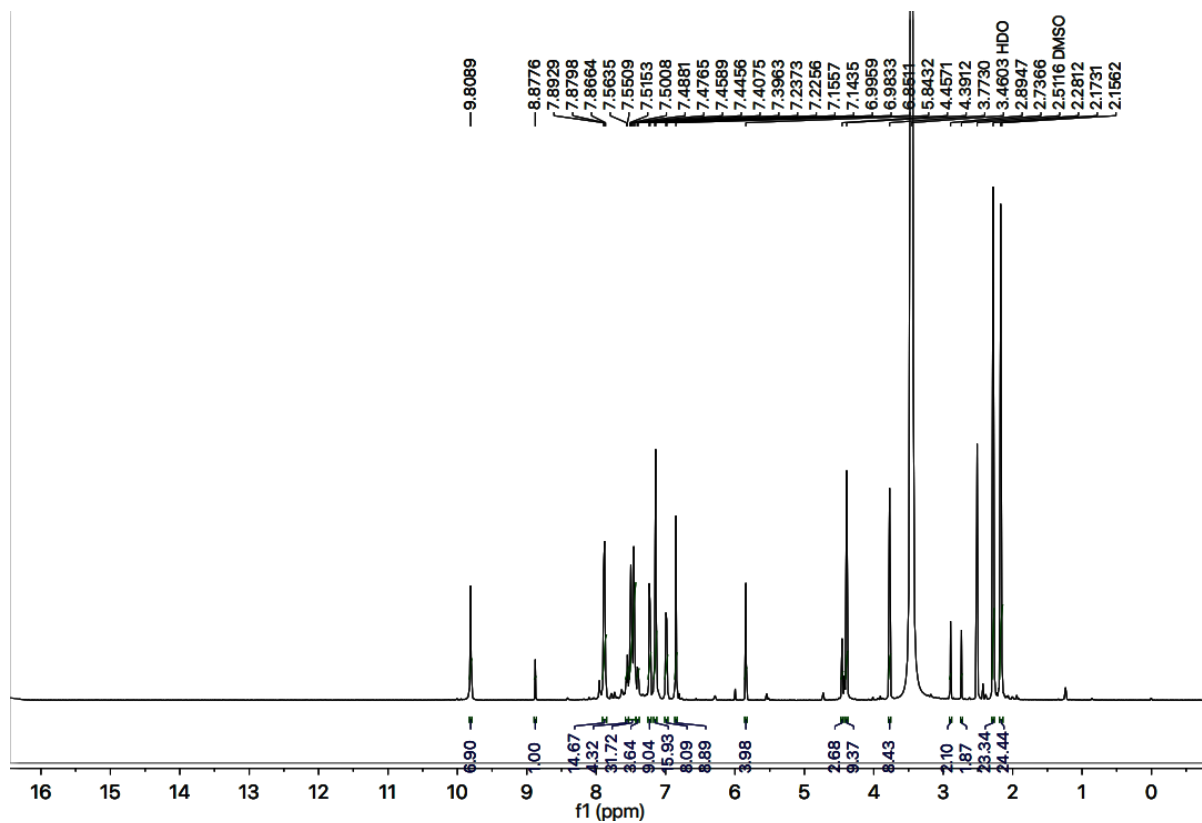

FIGURE S3  $^1\text{H-NMR}$  spectrum of **9b**

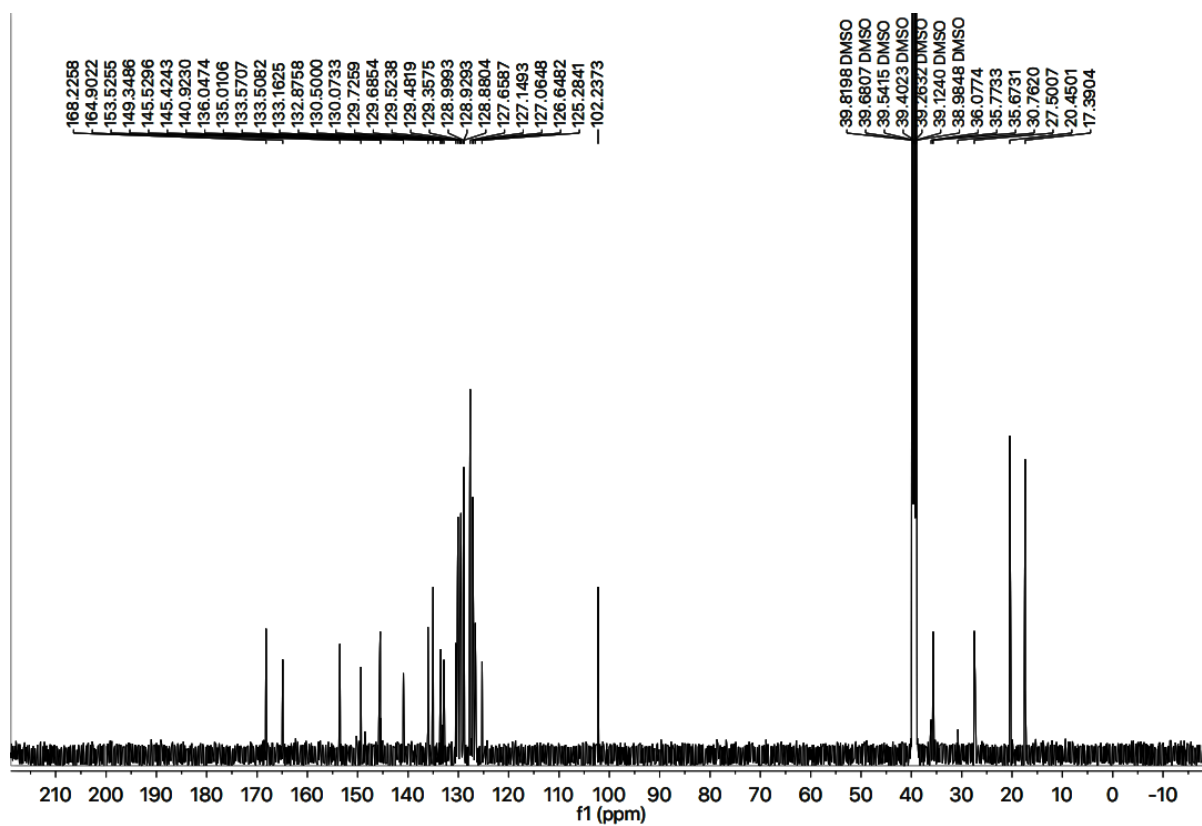

FIGURE S4  $^{13}\text{C-NMR}$  spectrum of **9b**

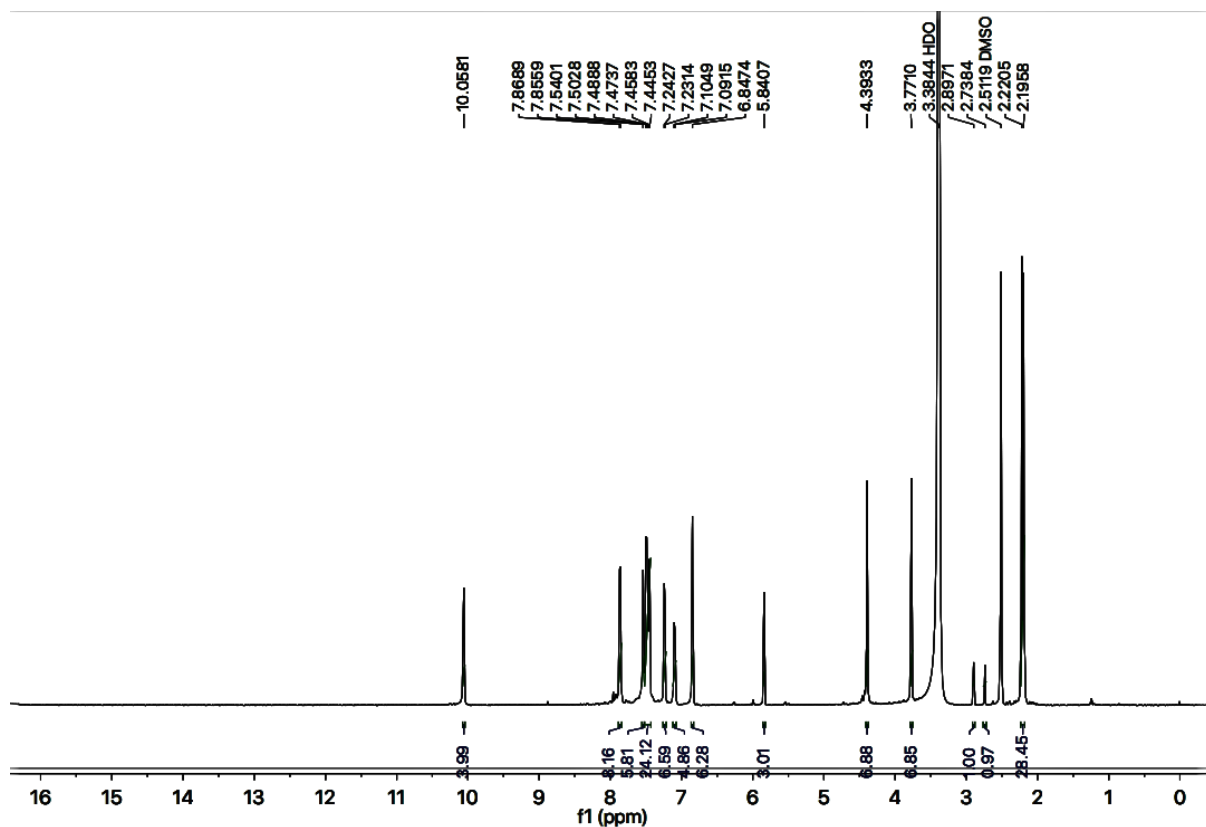

FIGURE S5 <sup>1</sup>H-NMR spectrum of 9d

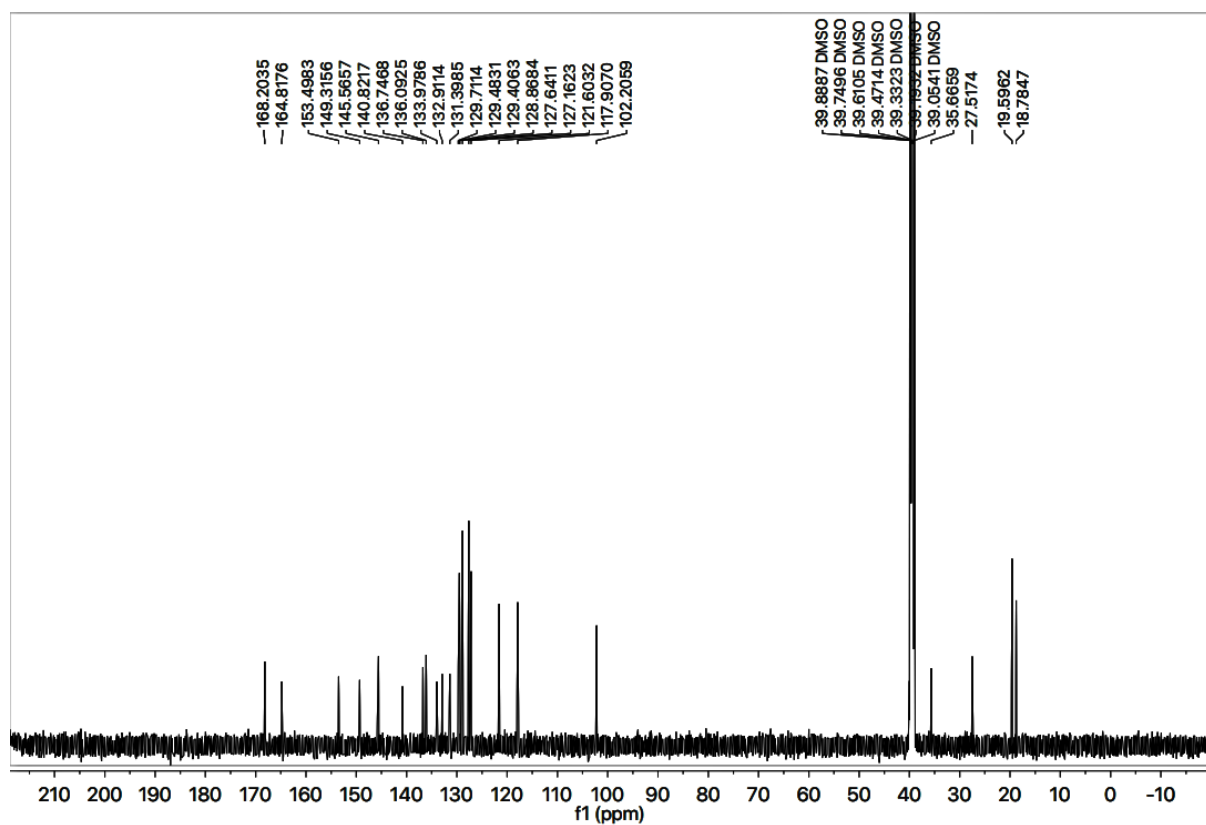

FIGURE S6 <sup>13</sup>C-NMR spectrum of 9d

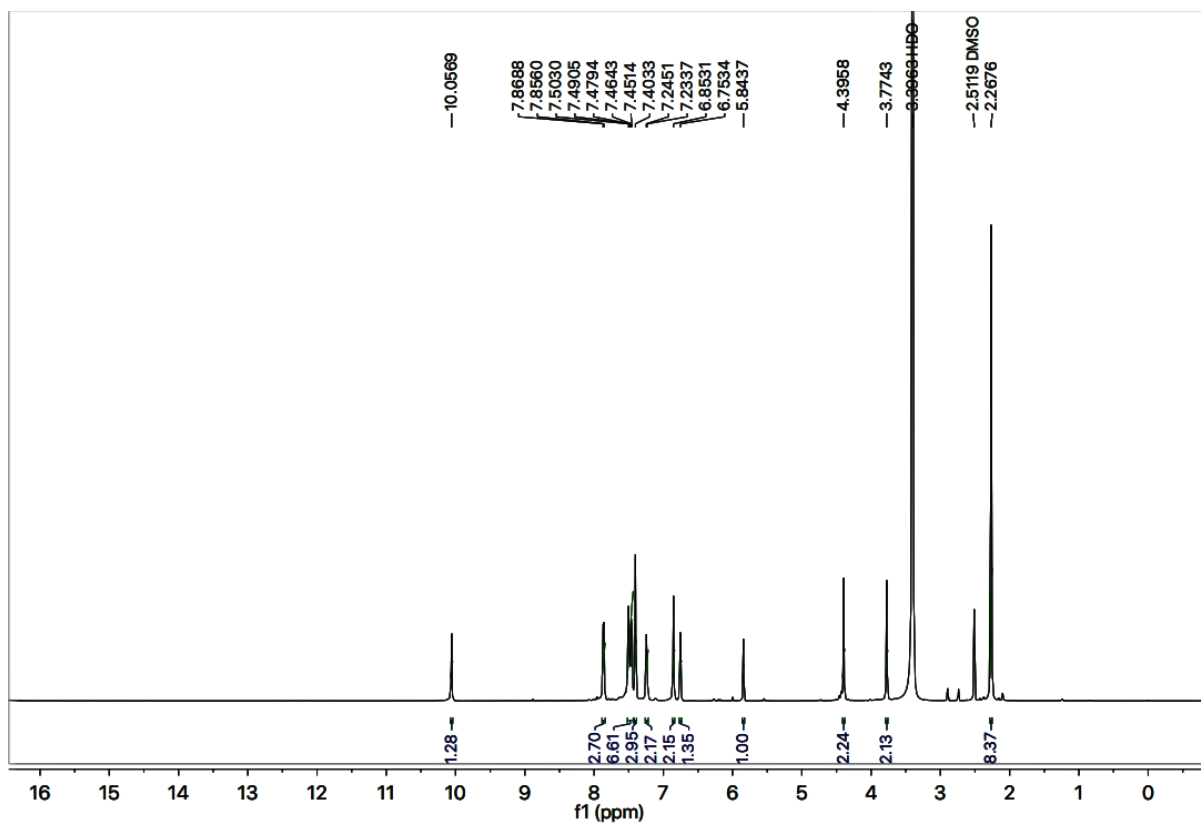

FIGURE S7 <sup>1</sup>H-NMR spectrum of **9e**

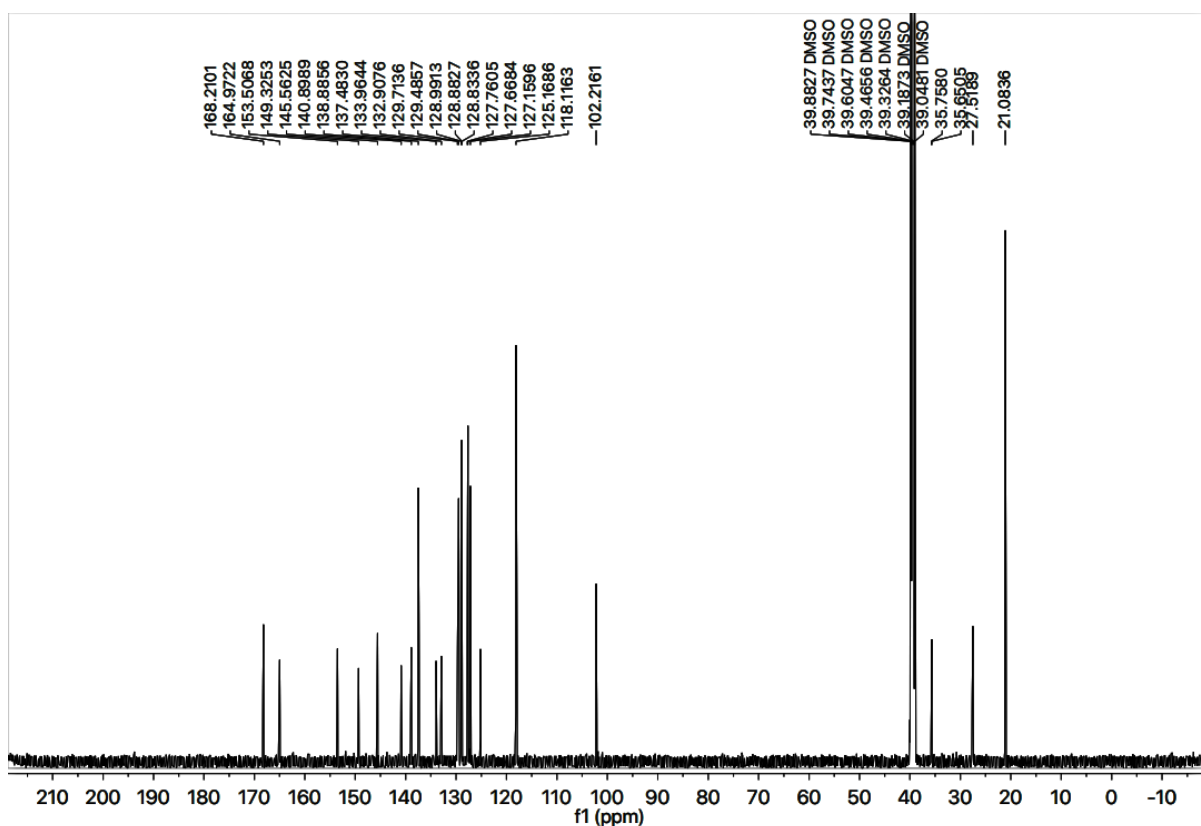

FIGURE S8 <sup>13</sup>C-NMR spectrum of **9e**

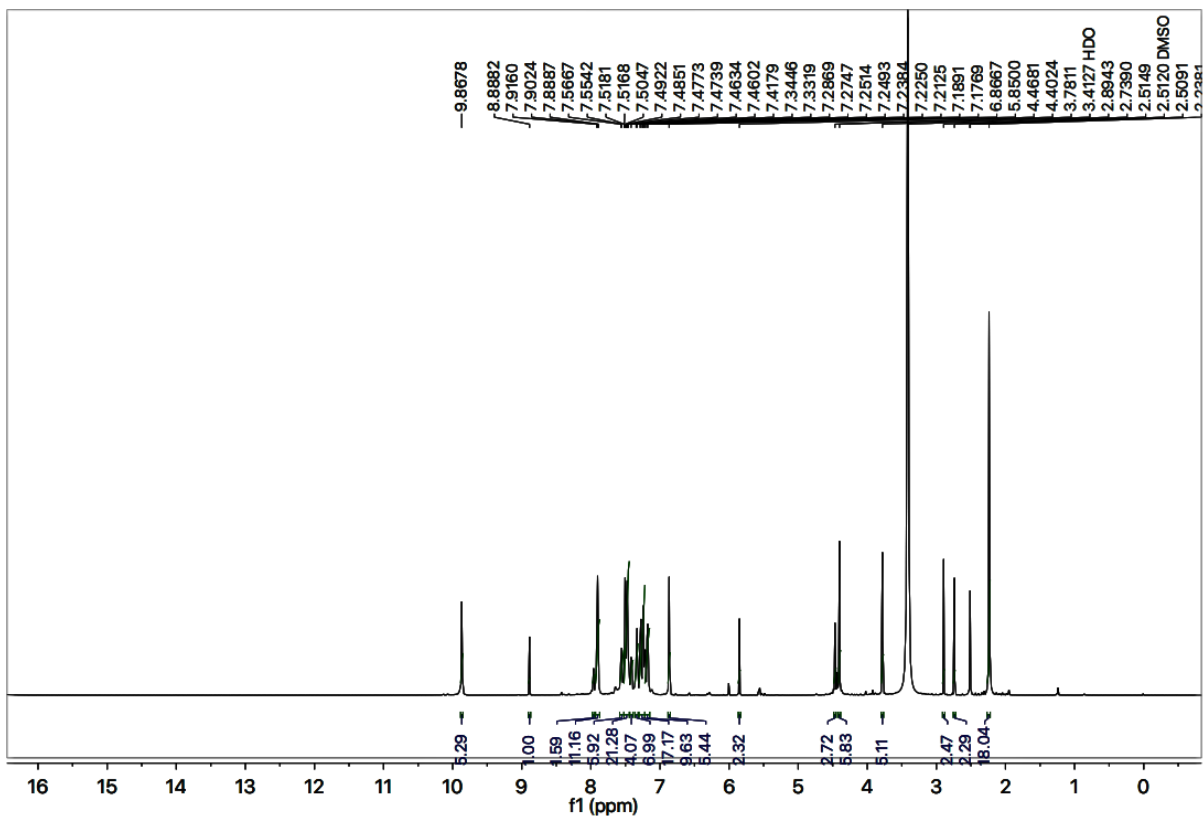

FIGURE S9 <sup>1</sup>H-NMR spectrum of **9f**

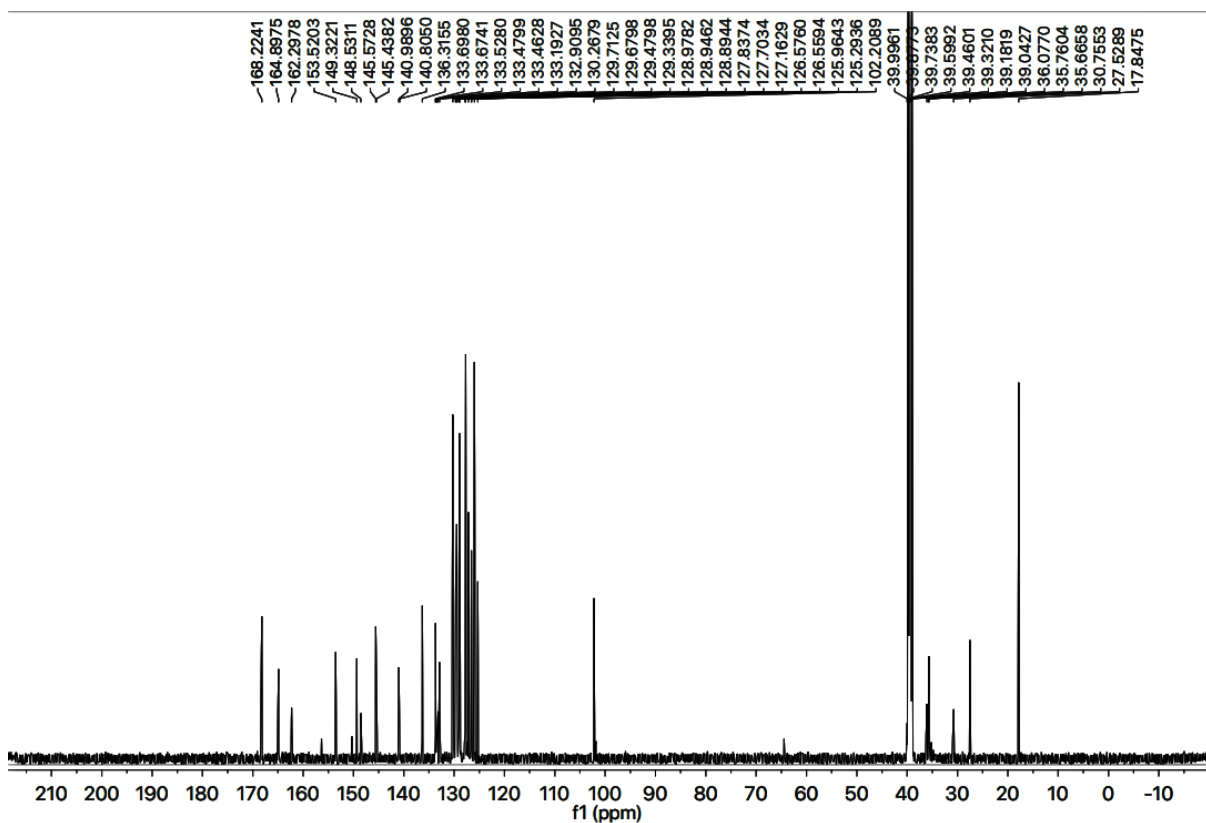

FIGURE S10 <sup>13</sup>C-NMR spectrum of **9f**

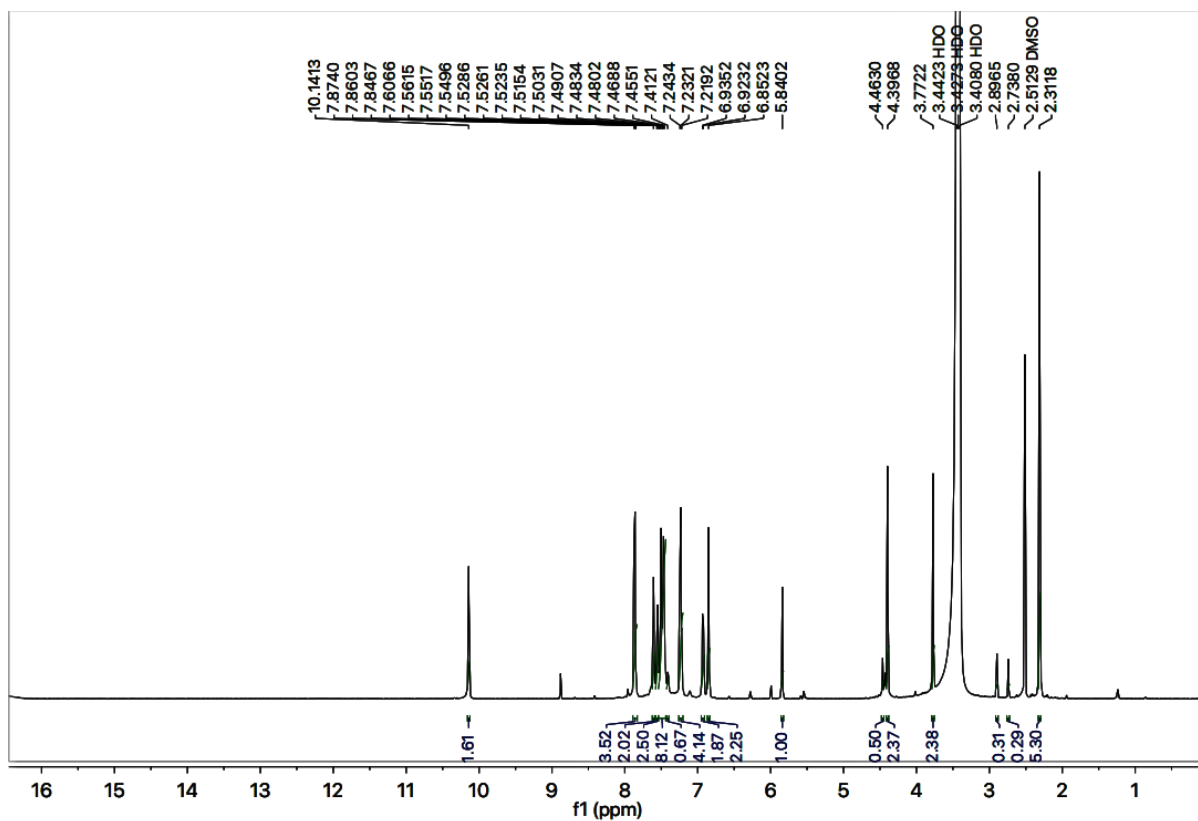

FIGURE S11  $^1\text{H}$ -NMR spectrum of **9g**

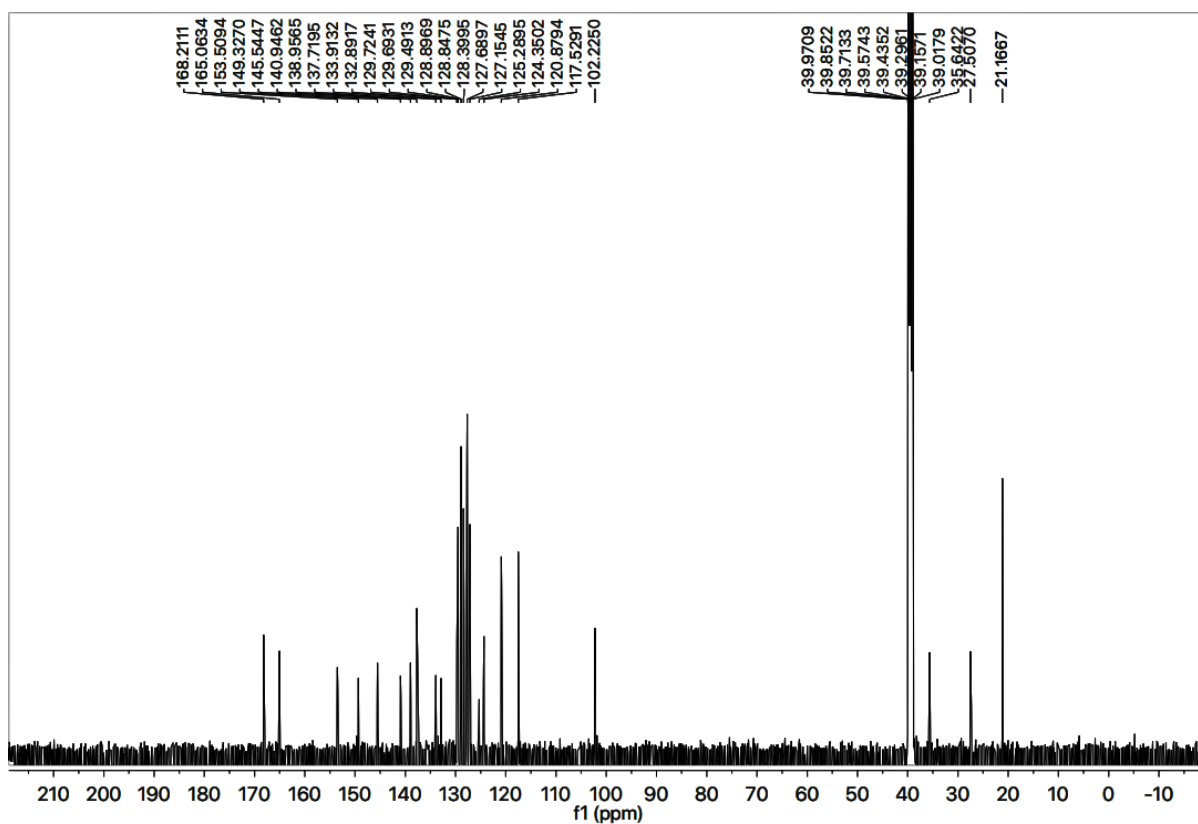

FIGURE S12  $^{13}\text{C}$ -NMR spectrum of **9g**

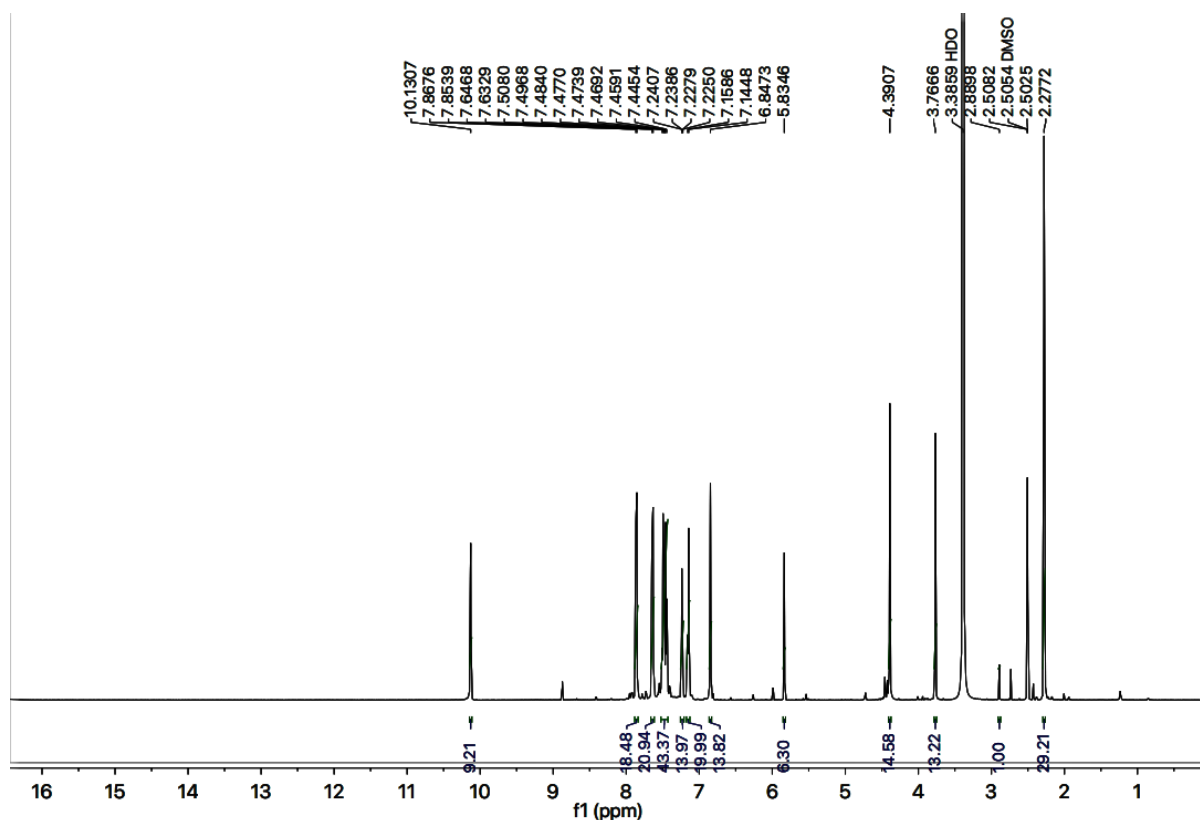

FIGURE S13 <sup>1</sup>H-NMR spectrum of 9h

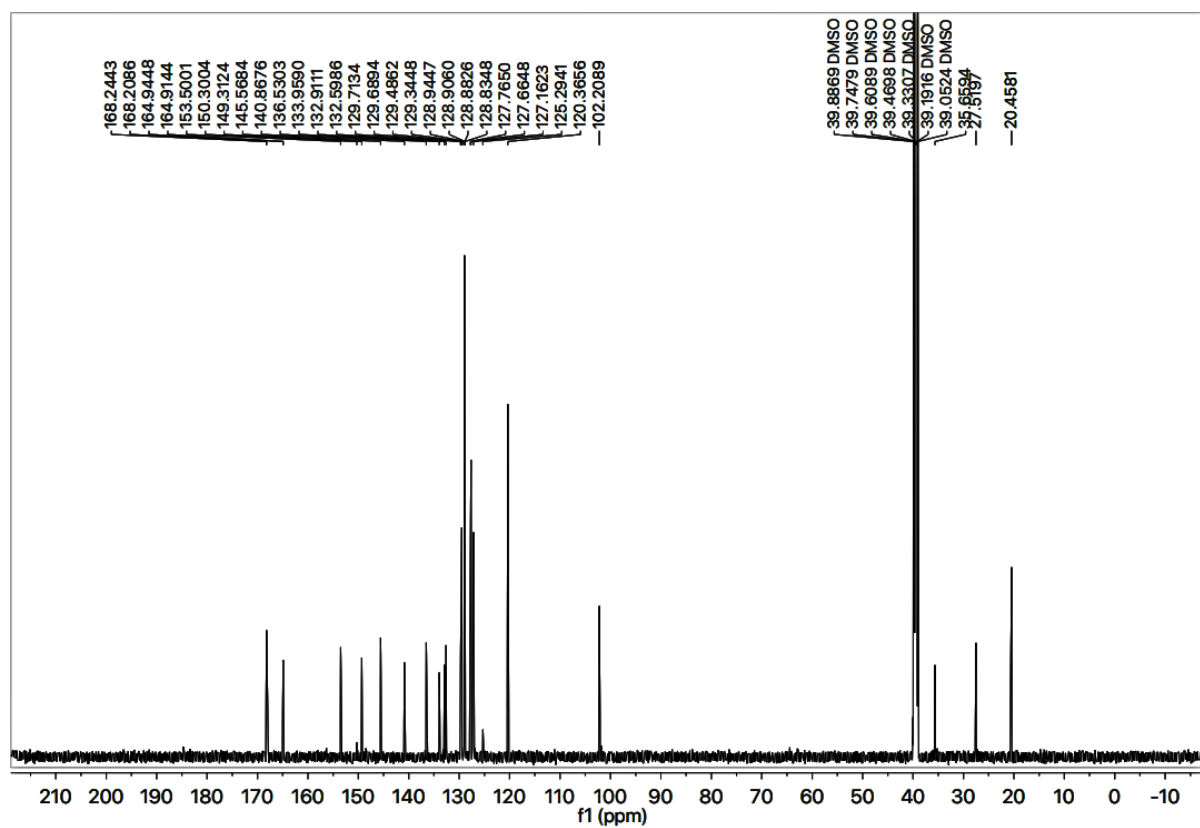

FIGURE S14 <sup>13</sup>C-NMR spectrum of 9h



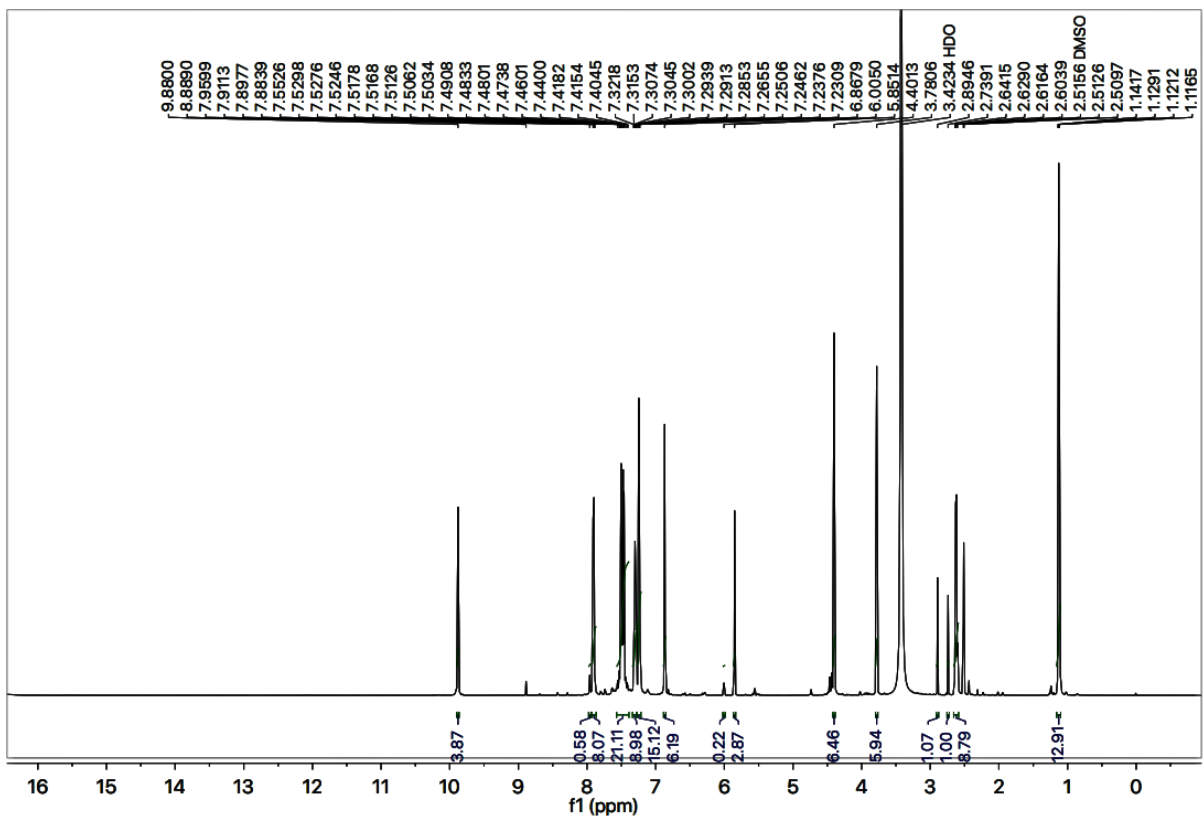

FIGURE S15 <sup>1</sup>H-NMR spectrum of **9i**

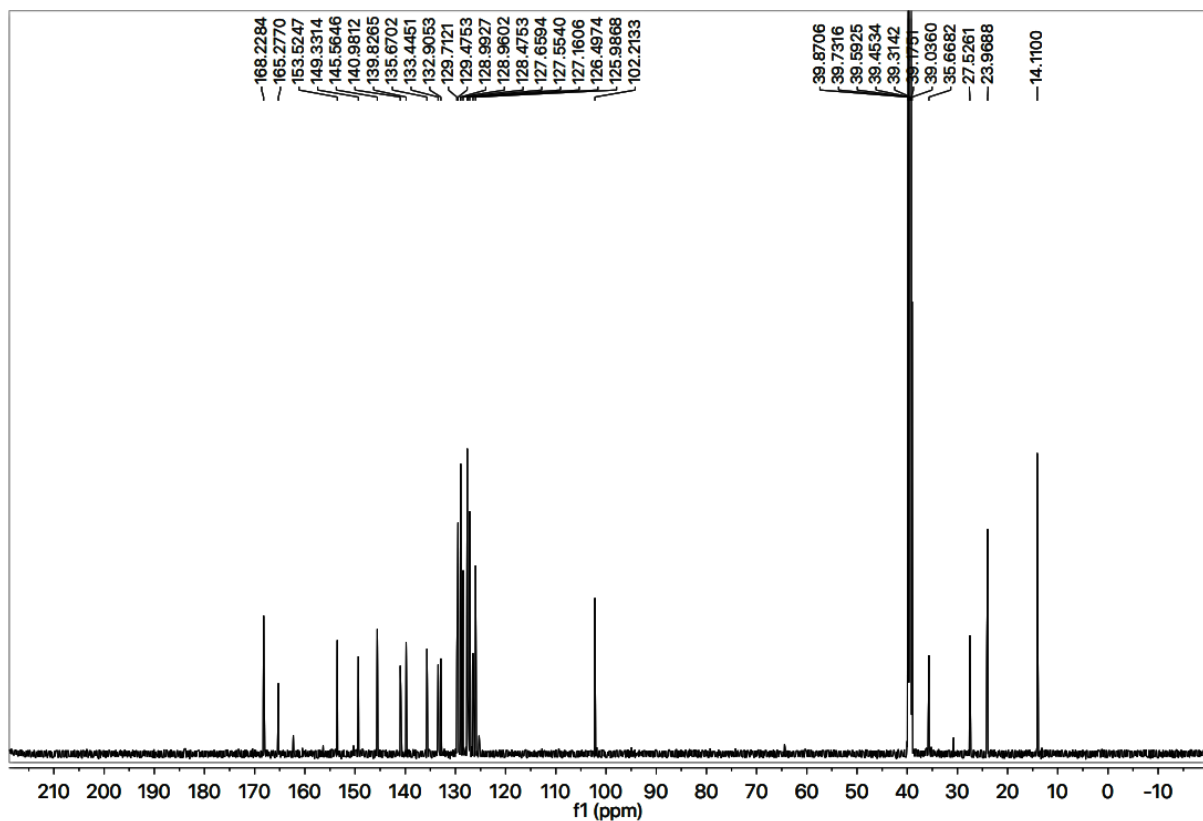

FIGURE S16 <sup>13</sup>C-NMR spectrum of **9i**

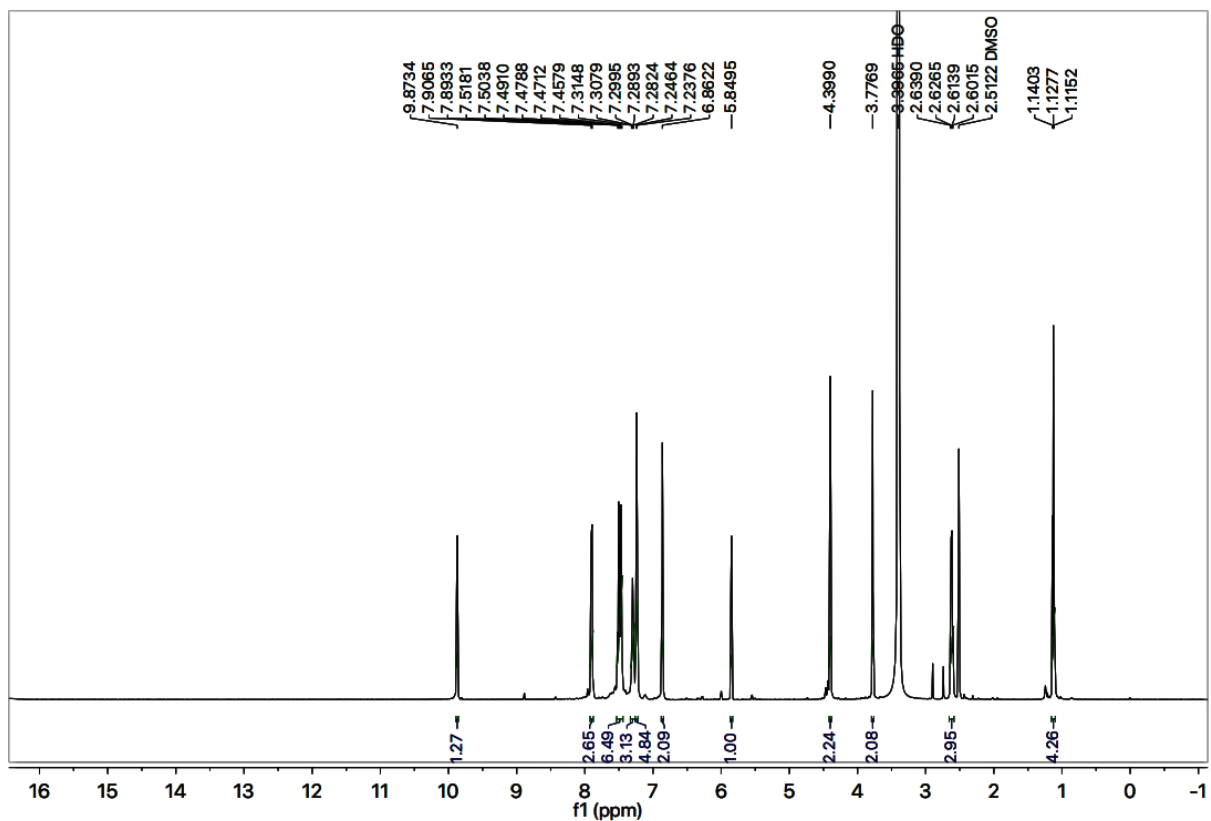

FIGURE S17 <sup>1</sup>H-NMR spectrum of **9j**

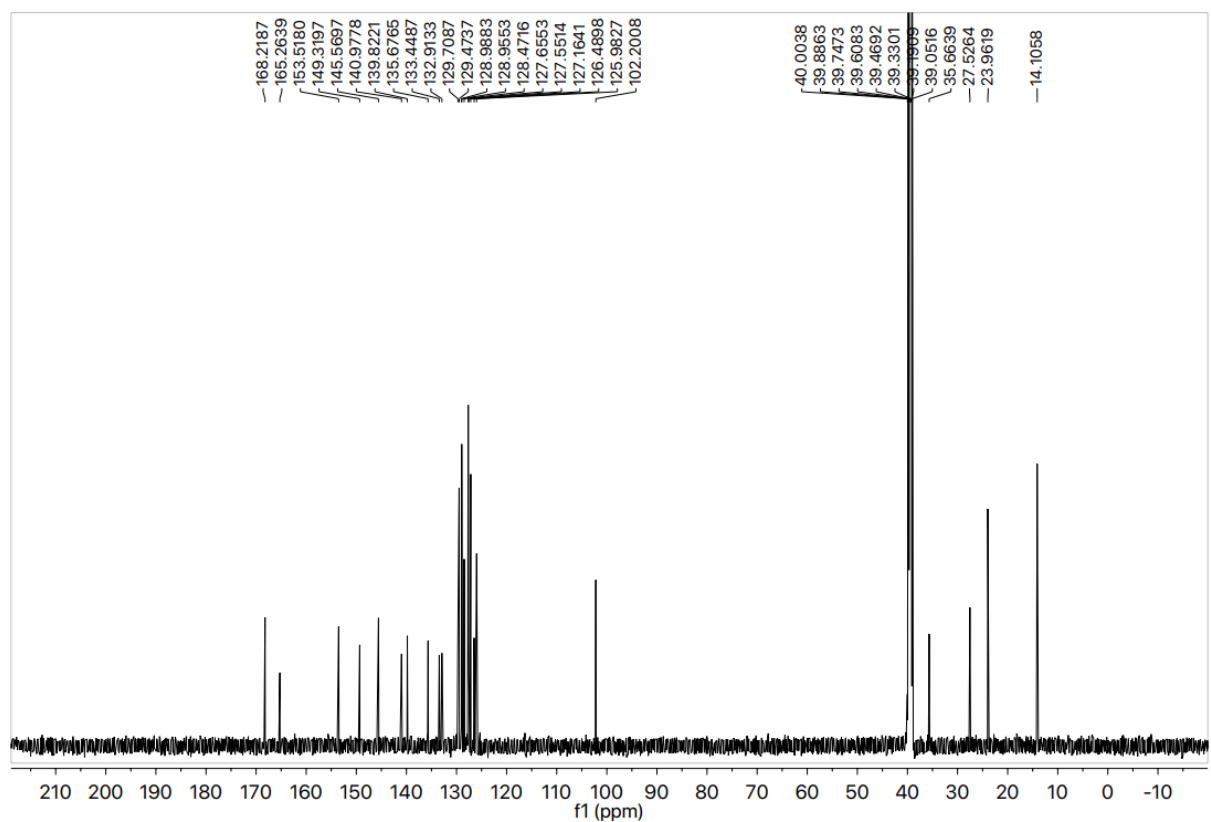

FIGURE S18 <sup>13</sup>C-NMR spectrum of **9j**

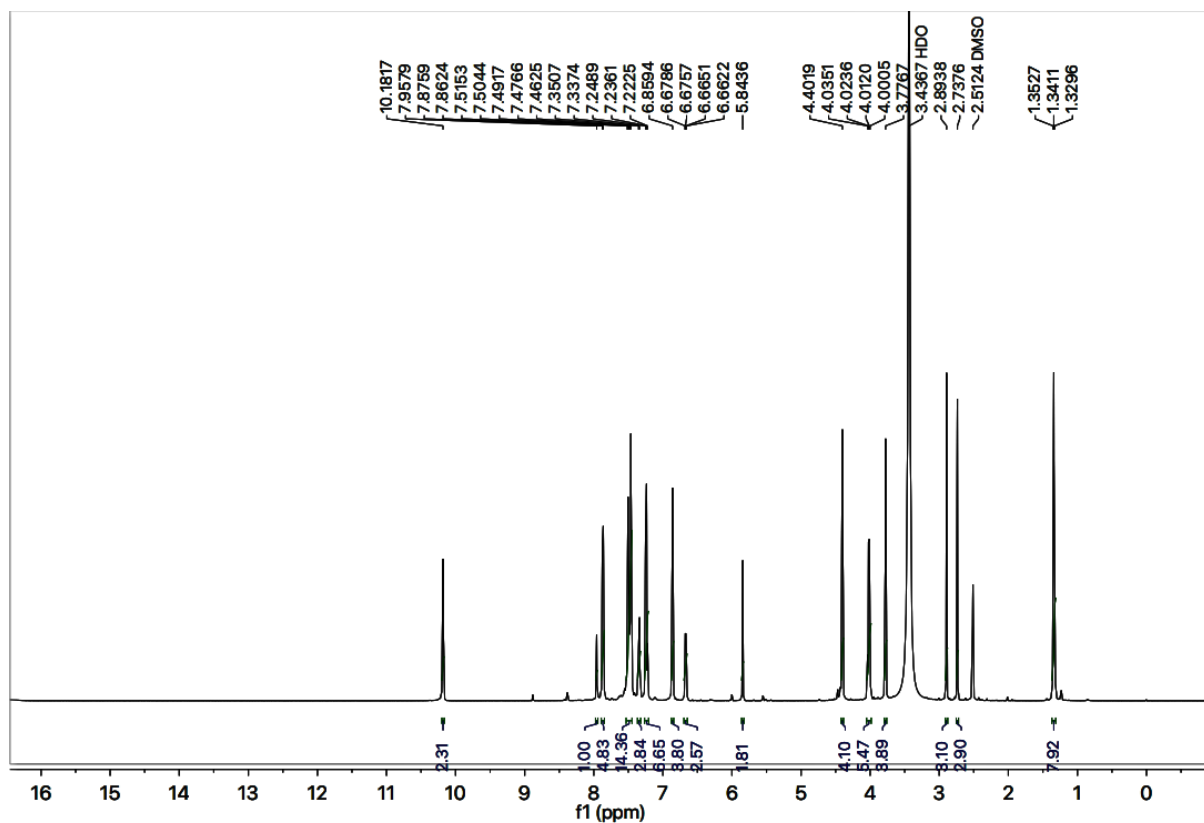

FIGURE S19  $^1\text{H-NMR}$  spectrum of **9k**

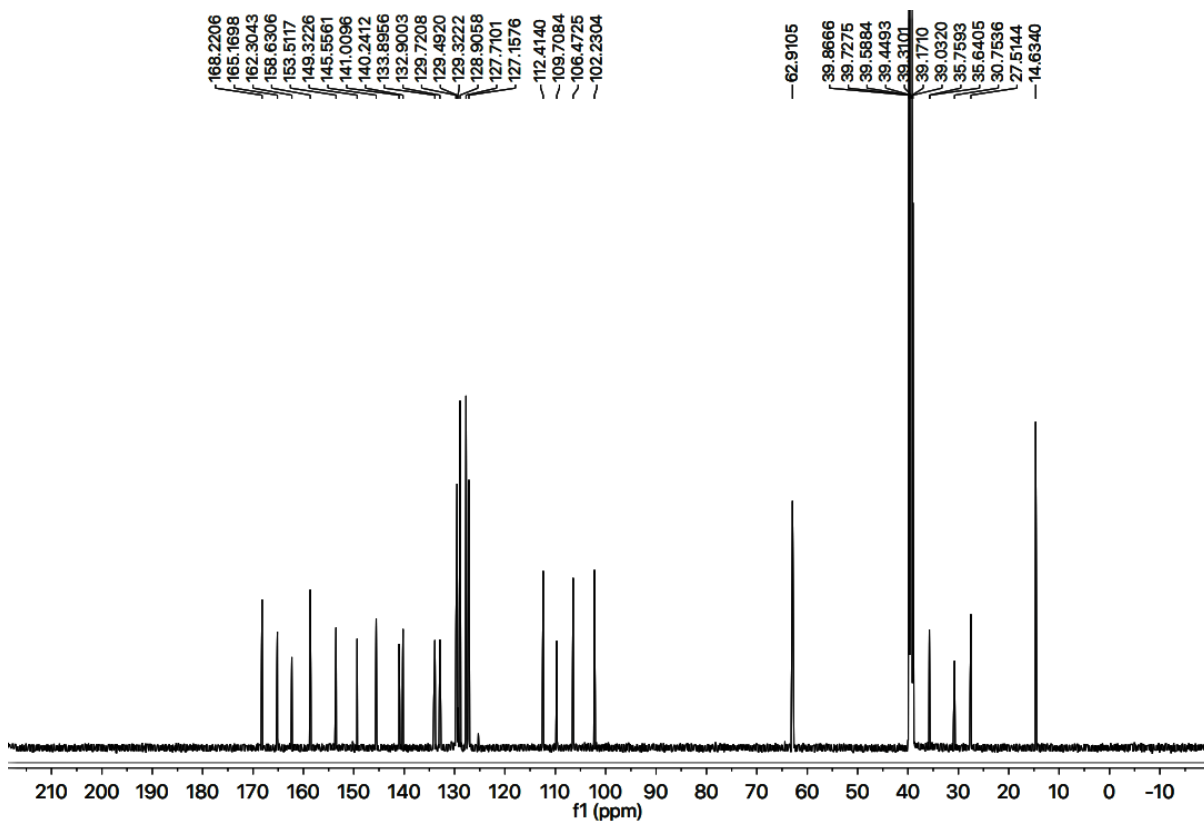

FIGURE S20  $^{13}\text{C-NMR}$  spectrum of **9k**

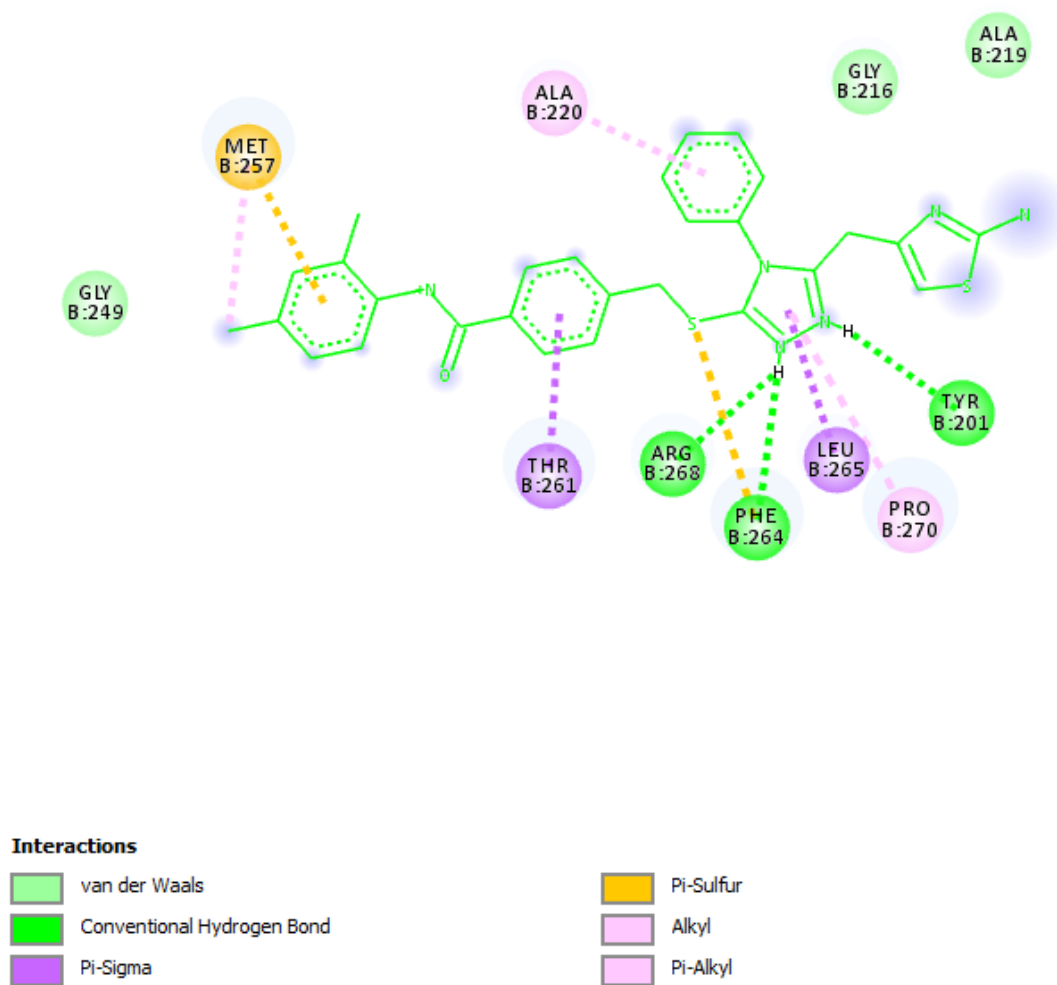

**FIGURE S21** Docked configuration of **9a**

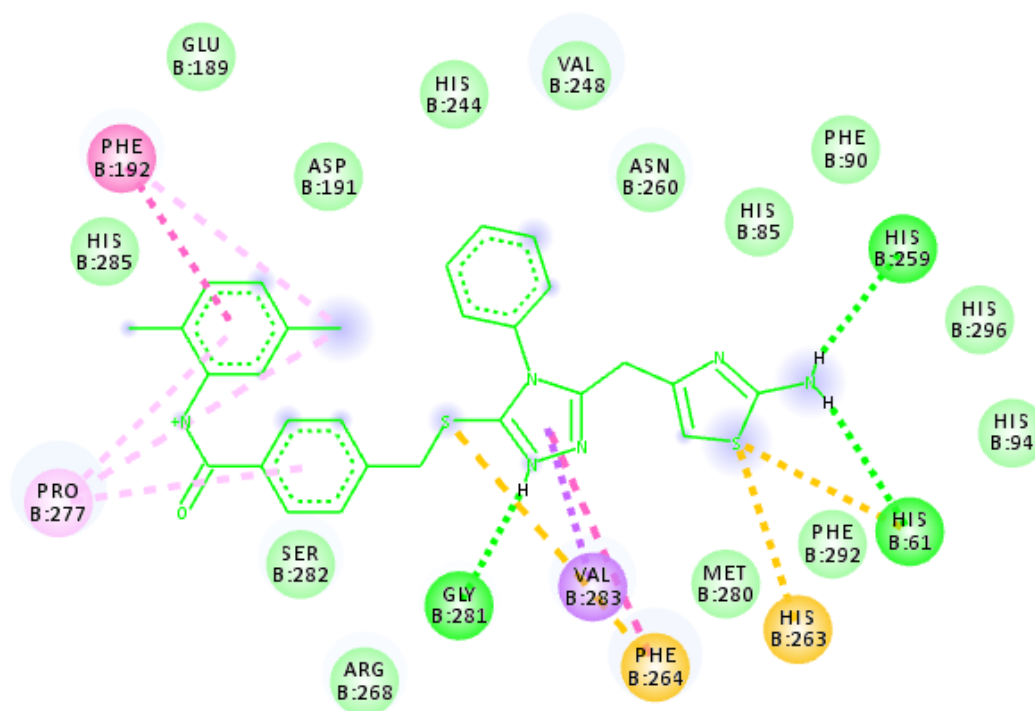

**Interactions**

|                                                                                     |                            |                                                                                      |                |
|-------------------------------------------------------------------------------------|----------------------------|--------------------------------------------------------------------------------------|----------------|
|  | van der Waals              |  | Pi-Pi T-shaped |
|  | Conventional Hydrogen Bond |   | Alkyl          |
|  | Pi-Sigma                   |   | Pi-Alkyl       |
|  | Pi-Sulfur                  |                                                                                      |                |

**FIGURE S22** Docked configuration of **9b**

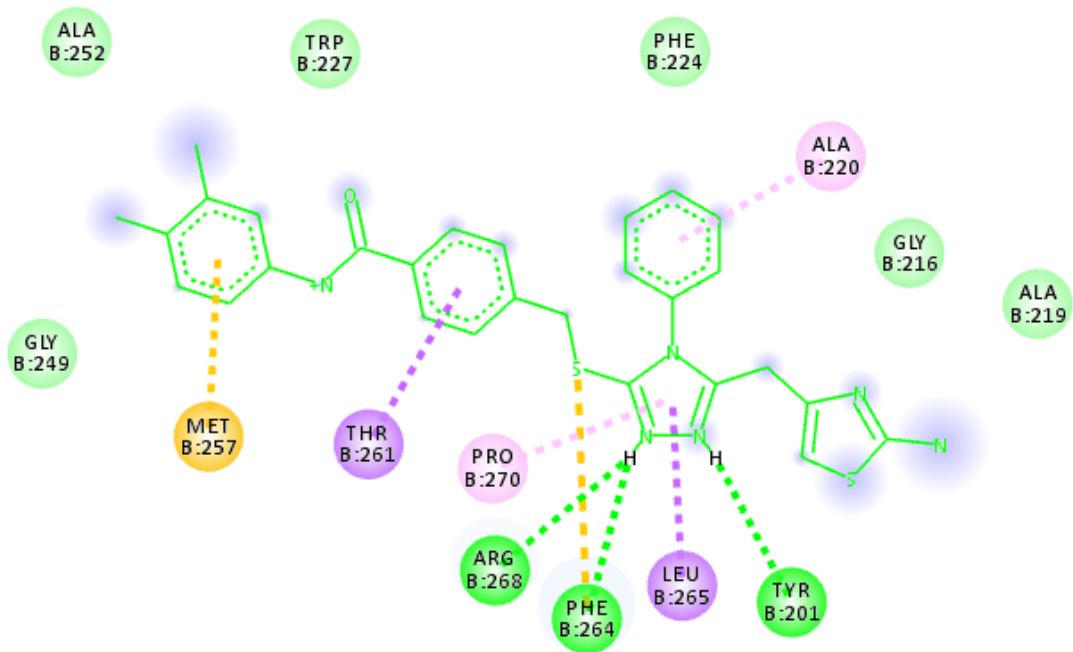

**Interactions**

|                                                                                                                                                                          |                                                                                                                                                         |
|--------------------------------------------------------------------------------------------------------------------------------------------------------------------------|---------------------------------------------------------------------------------------------------------------------------------------------------------|
| <span style="display: inline-block; width: 15px; height: 10px; background-color: #d9ead3; border: 1px solid #ccc; margin-right: 5px;"></span> van der Waals              | <span style="display: inline-block; width: 15px; height: 10px; background-color: #f1c40f; border: 1px solid #ccc; margin-right: 5px;"></span> Pi-Sulfur |
| <span style="display: inline-block; width: 15px; height: 10px; background-color: #e74c3c; border: 1px solid #ccc; margin-right: 5px;"></span> Conventional Hydrogen Bond | <span style="display: inline-block; width: 15px; height: 10px; background-color: #fff3cd; border: 1px solid #ccc; margin-right: 5px;"></span> Pi-Alkyl  |
| <span style="display: inline-block; width: 15px; height: 10px; background-color: #2980b9; border: 1px solid #ccc; margin-right: 5px;"></span> Pi-Sigma                   |                                                                                                                                                         |

**FIGURE S23** Docked configuration of **9d**

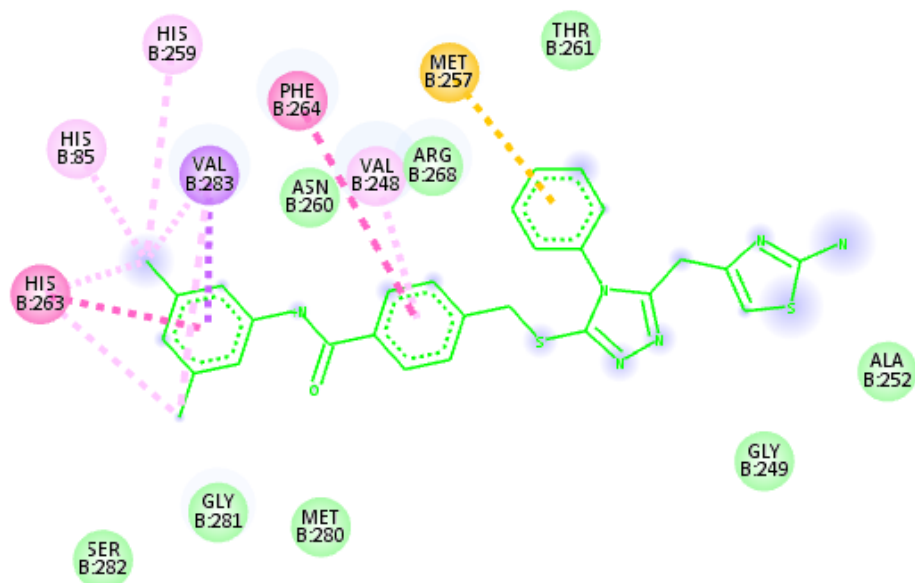

**Interactions**

- van der Waals
- Pi-Sigma
- Pi-Sulfur
- Pi-Pi Stacked

- Pi-Pi T-shaped
- Alkyl
- Pi-Alkyl

**FIGURE S24** Docked configuration of **9e**

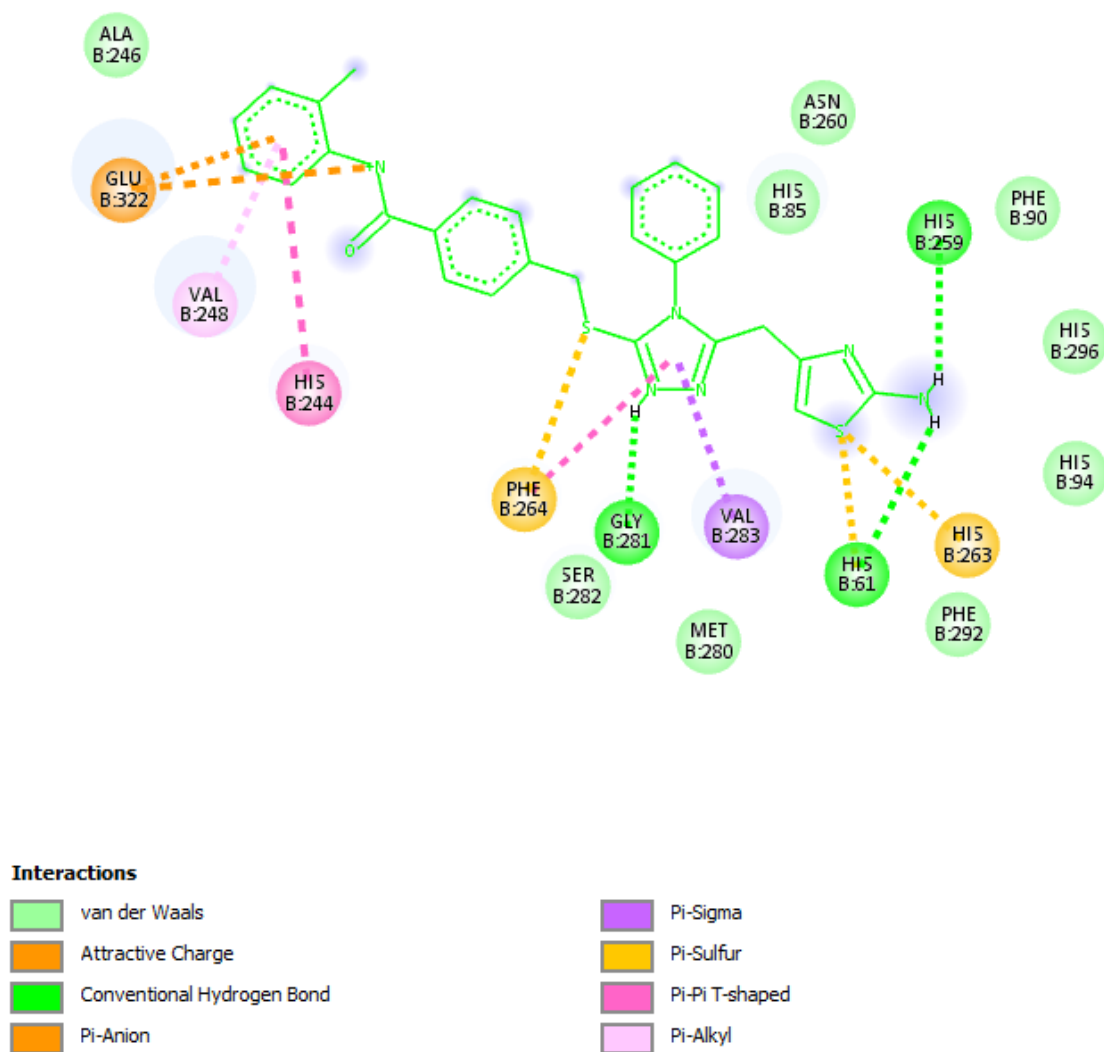

**FIGURE S25** Docked configuration of **9f**



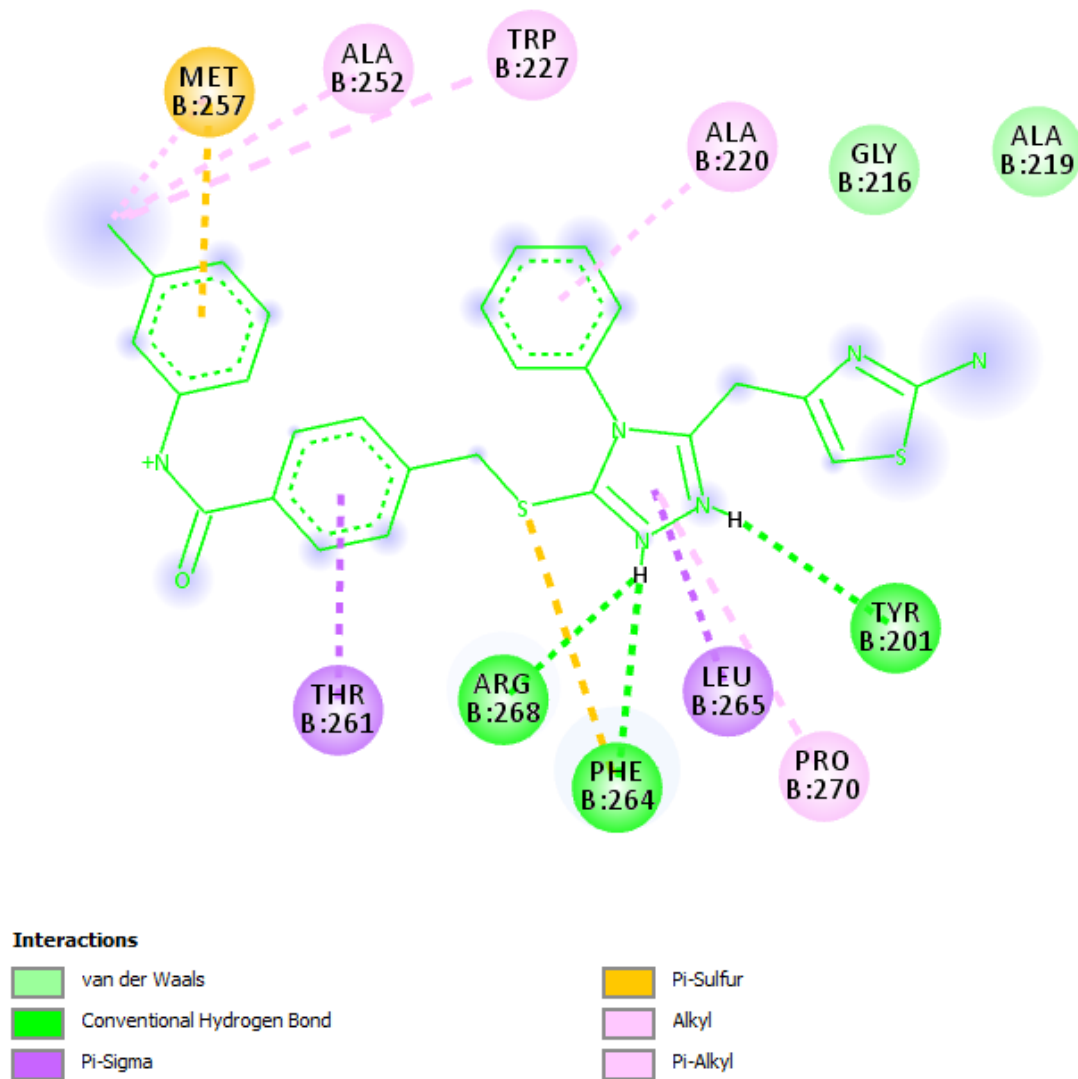

**FIGURE S26** Docked configuration of **9g**

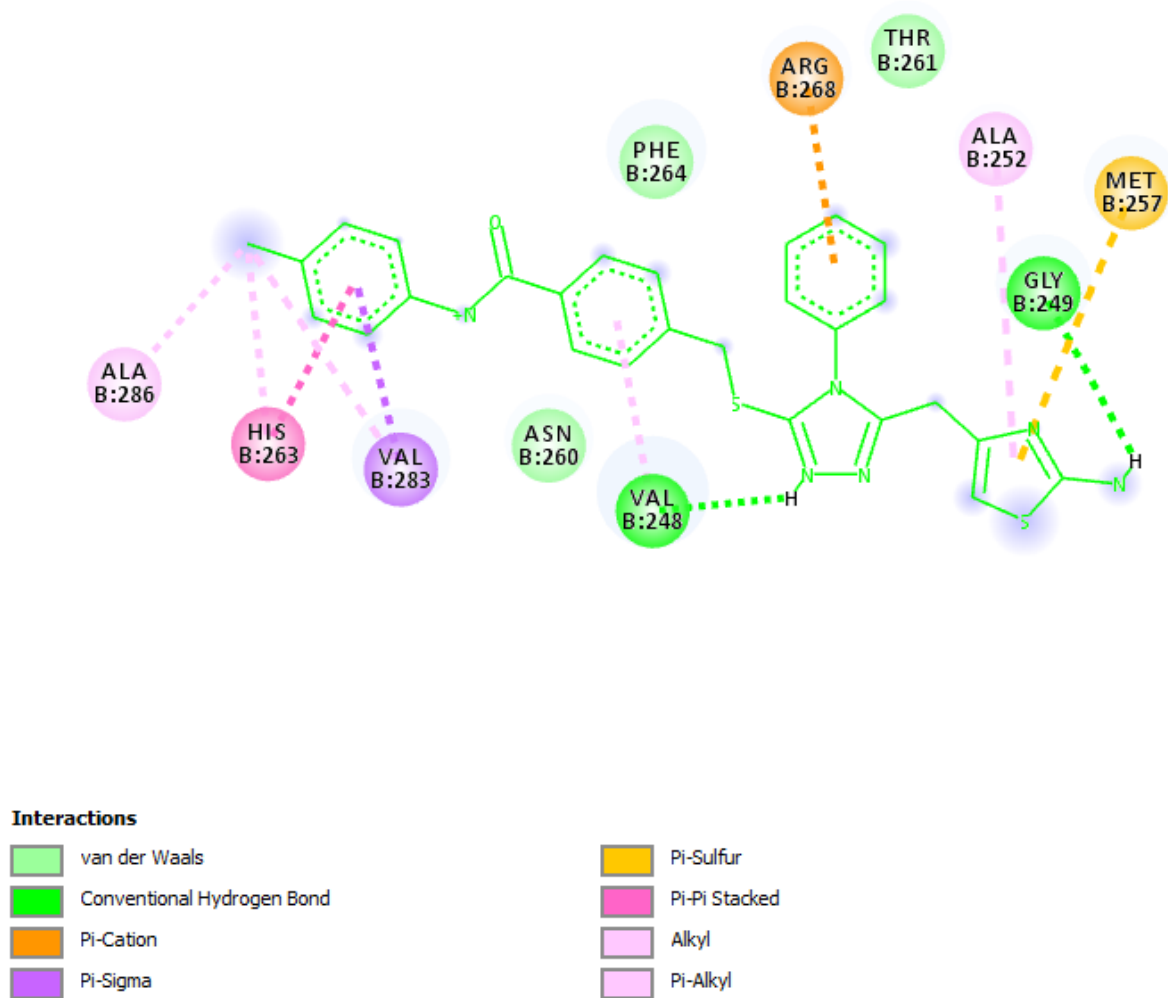

**FIGURE S27** Docked configuration of **9h**

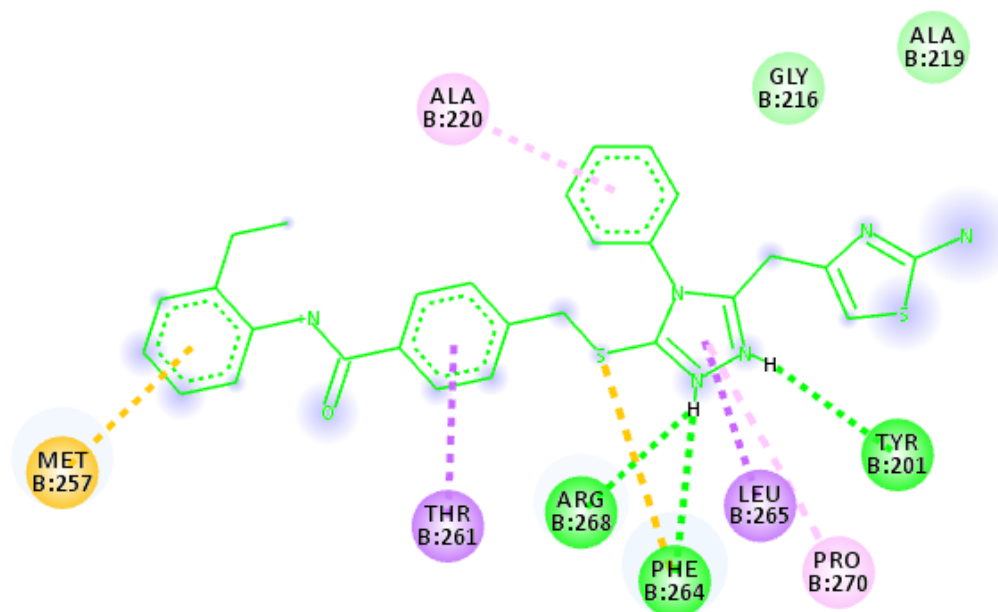

**Interactions**

|                                                                                                                                                                          |                                                                                                                                                         |
|--------------------------------------------------------------------------------------------------------------------------------------------------------------------------|---------------------------------------------------------------------------------------------------------------------------------------------------------|
| <span style="display: inline-block; width: 15px; height: 10px; background-color: #d9ead3; border: 1px solid #ccc; margin-right: 5px;"></span> van der Waals              | <span style="display: inline-block; width: 15px; height: 10px; background-color: #f4cccc; border: 1px solid #ccc; margin-right: 5px;"></span> Pi-Sulfur |
| <span style="display: inline-block; width: 15px; height: 10px; background-color: #f4cccc; border: 1px solid #ccc; margin-right: 5px;"></span> Conventional Hydrogen Bond | <span style="display: inline-block; width: 15px; height: 10px; background-color: #fff2cc; border: 1px solid #ccc; margin-right: 5px;"></span> Pi-Alkyl  |
| <span style="display: inline-block; width: 15px; height: 10px; background-color: #d9ead3; border: 1px solid #ccc; margin-right: 5px;"></span> Pi-Sigma                   |                                                                                                                                                         |

**FIGURE S28** Docked configuration of **9i**

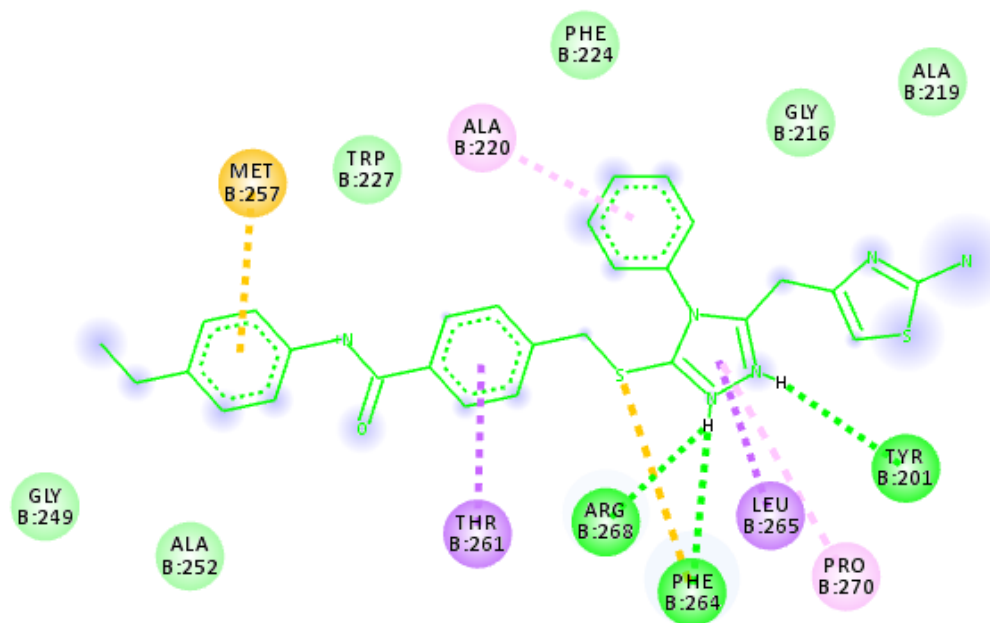

**Interactions**

- |                                                                                                                                                                          |                                                                                                                                                         |
|--------------------------------------------------------------------------------------------------------------------------------------------------------------------------|---------------------------------------------------------------------------------------------------------------------------------------------------------|
| <span style="display: inline-block; width: 15px; height: 10px; background-color: #d9ead3; border: 1px solid #ccc; margin-right: 5px;"></span> van der Waals              | <span style="display: inline-block; width: 15px; height: 10px; background-color: #f1c40f; border: 1px solid #ccc; margin-right: 5px;"></span> Pi-Sulfur |
| <span style="display: inline-block; width: 15px; height: 10px; background-color: #27ae60; border: 1px solid #ccc; margin-right: 5px;"></span> Conventional Hydrogen Bond | <span style="display: inline-block; width: 15px; height: 10px; background-color: #f080f0; border: 1px solid #ccc; margin-right: 5px;"></span> Pi-Alkyl  |
| <span style="display: inline-block; width: 15px; height: 10px; background-color: #9b59b6; border: 1px solid #ccc; margin-right: 5px;"></span> Pi-Sigma                   |                                                                                                                                                         |

**FIGURE S29** Docked configuration of **9j**

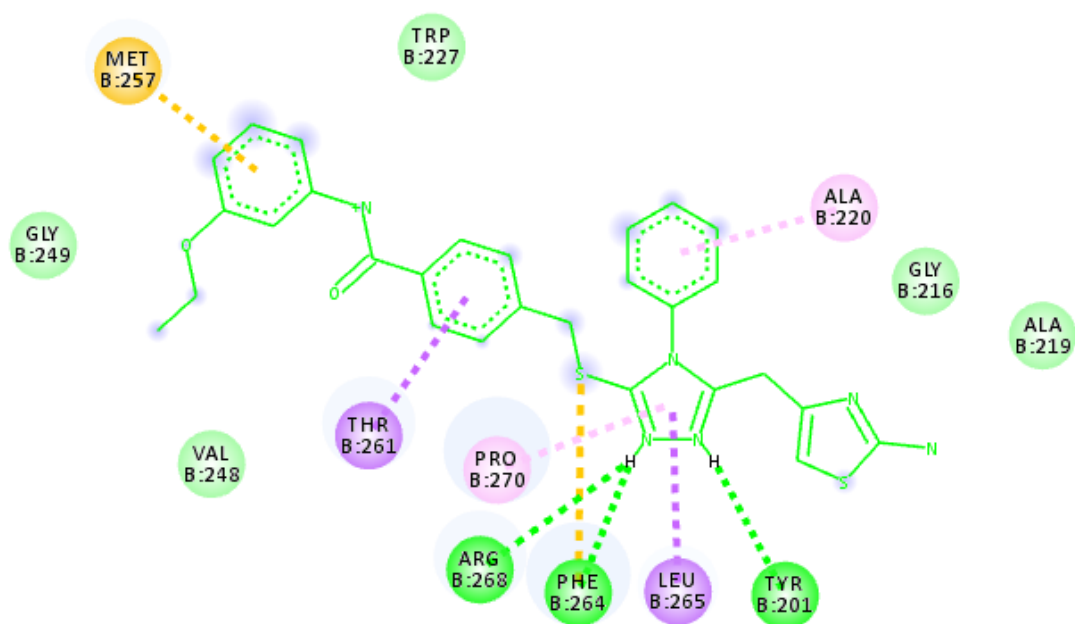

**Interactions**

|                                                                                     |                            |                                                                                     |           |
|-------------------------------------------------------------------------------------|----------------------------|-------------------------------------------------------------------------------------|-----------|
|  | van der Waals              |  | Pi-Sulfur |
|  | Conventional Hydrogen Bond |  | Pi-Alkyl  |
|  | Pi-Sigma                   |                                                                                     |           |

**FIGURE S30** Docked configuration of **9k**
